# Supplementary material
Source: PubMed Central journal article supplement (PMC2966046)

SI Figure 1

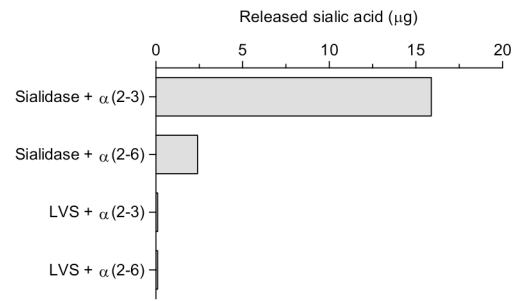

SI Figure 2

A

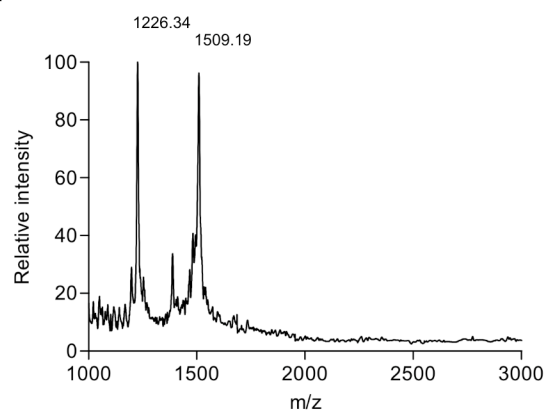

B

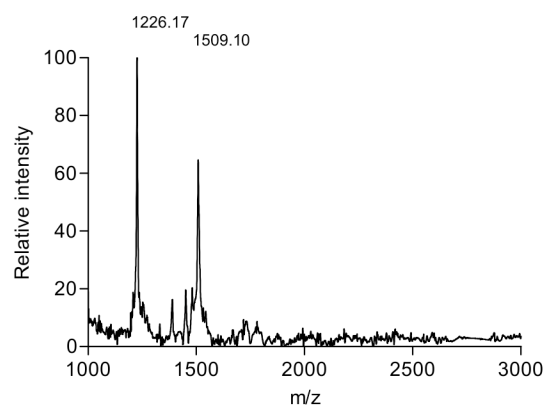

Supplement: supp_M110.166314_SI_Figures.pdf [file supp_M110.166314_SI_Figures.pdf]
